# Supplementary material for: Direct deposition of Sn-doped CsPbBr3 perovskite for efficient solar cell application
Source: Royal Society of Chemistry journal article supplement (doi:10.1039/d0ra09202a), 2021-01-01
Supplement: d0ra09202a1.pdf [file d0ra09202a1.pdf]

## Electronic Supplementary Information

### Direct deposition of Sn doped CsPbBr<sub>3</sub> perovskite for efficient solar cells application

Mukerem Helil Abib<sup>a,b</sup>, Junchun Li<sup>a</sup>, Heming Yang<sup>a</sup>, Man Wang<sup>a</sup>, Taotao Chen<sup>a</sup>,  
Enze Xu<sup>a</sup>, Yang Jiang<sup>a, c\*</sup>,

<sup>a</sup>School of Materials Science and Engineering, and <sup>b</sup>School of Electrical Engineering and  
Automation, Hefei University of Technology, Hefei, 230009, P. R. China

<sup>c</sup> Jiangsu Key Laboratory for Carbon-Based Functional Materials & Devices, Soochow  
University, Suzhou, 215123, P. R. China

\*Corresponding authors: Fax & Tel: +86-551-62904358 Email: apjiang@hfut.edu.cn  
(Prof. Y. Jiang)

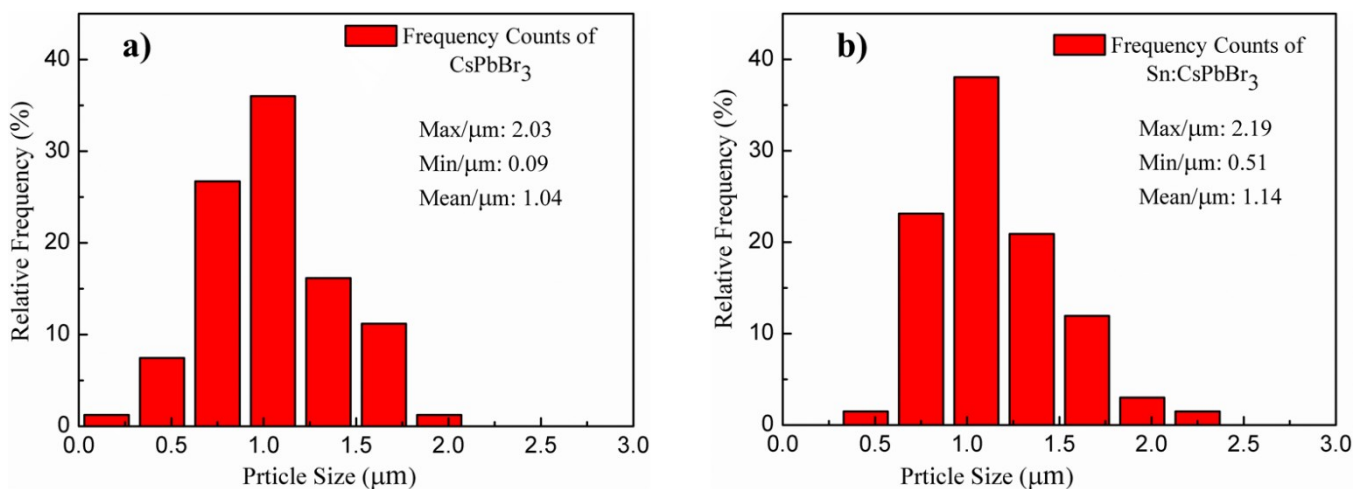

**Figure S1.** The static particle size distribution data of (a) pristine CsPbBr<sub>3</sub> and (b) with 0.2 % Sn ion doped CsPbBr<sub>3</sub> perovskite thin-film.

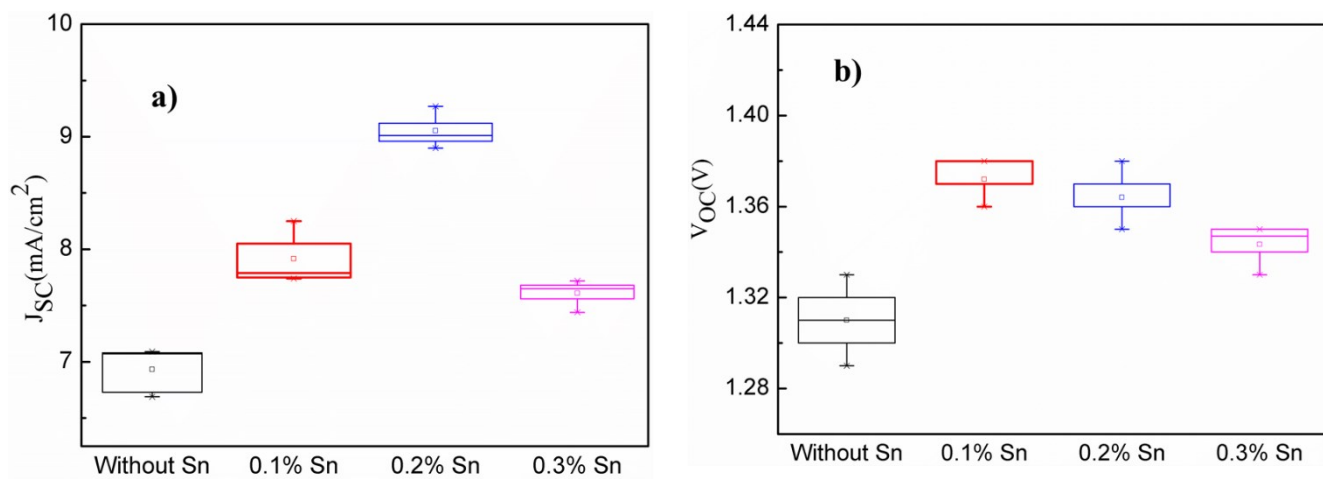

**Figure S2.** (a) Current density ( $J_{sc}$ ) and (b) open-circuit voltage ( $V_{oc}$ ) statistical distribution of without Sn, 0.1% Sn, 0.2% Sn and 0.3% Sn CsPbBr<sub>3</sub> PSCs devices respectively.
